# Supplementary material for: A multi-ethnic epigenome-wide association study of leukocyte DNA methylation and blood lipids
Source: PubMed Central journal article supplement (PMC8238961; doi:10.1038/s41467-021-23899-y), 2021-06-28
Supplement: 41467_2021_23899_MOESM3_ESM.pdf [file 41467_2021_23899_MOESM3_ESM.pdf]

## **Description of Additional Supplementary Files**

### **Supplementary Data 1:**

DNA methylation and genotyping measurement details by cohort

### **Supplementary Data 2:**

Significant CpG-lipid association meta-analyses and annotations for Models 3 and 4 stratified by racial/ethnic group and combined

### **Supplementary Data 3:**

Significant methylation quantitative trait loci identified for the 30 CpGs found to be significantly associated with lipids in more than one racial/ethnic group

### **Supplementary Data 4:**

Methylation quantitative trait loci (mQTL) entries in the methylation QTL database (<http://www.mqtl.db.org/>) for seven CpGs found to have one or more mQTLs among Europeans in this study

### **Supplementary Data 5:**

List of genome wide significant SNP-association for lipids identified through prior GWAS found to be within 10 megabases of significant CpG-lipid pairs identified in this epigenome wide association study without actually being located within the same gene.
